# Supplementary material for: Effect of a Neonatal Resuscitation Course on Healthcare Providers’ Performances Assessed by Video Recording in a Low-Resource Setting
Source: PubMed Central journal article supplement (PMC4684235; doi:10.1371/journal.pone.0144443), 2015-12-11
Supplement: pone.0144443.s001.pdf [file pone.0144443.s001.pdf]

| ID/procedure | Group | Performed Initial Steps | Equipment preparation | Newborn positioning | Head positioning | Suction | Drying | Remove wet linen | Naked newborn | Stimulation | HR assessment | Score Initial Steps | Performed BMV | Start PPV in air room | Correct FM positioning | Correct RR frequency | Chest movements | HR detection (after 30 sec) | Score BMV | Performed CC | Correct method | Correct frequency and death | Correct ventilation frequency | Correct COventilation ratio (3:1) | HR assessment | Score CC |    |
|--------------|-------|-------------------------|-----------------------|---------------------|------------------|---------|--------|------------------|---------------|-------------|---------------|---------------------|---------------|-----------------------|------------------------|----------------------|-----------------|-----------------------------|-----------|--------------|----------------|-----------------------------|-------------------------------|-----------------------------------|---------------|----------|----|
| 1            | BC    | yes                     | 0                     | 2                   | 2                | 1       | 0      | 0                | 0             | 1           | 0             | 22222222            | no            | 0                     | 0                      | 0                    | 0               | 0                           | 0         | 0            | 0              | 0                           | 0                             | 0                                 | 0             | 0        |    |
| 2            | BC    | yes                     | 0                     | 2                   | 2                | 1       | 0      | 0                | 0             | 1           | 0             | 33333333            | no            | 0                     | 0                      | 0                    | 0               | 0                           | 0         | 0            | 0              | 0                           | 0                             | 0                                 | 0             | 0        |    |
| 3            | BC    | yes                     | 2                     | 2                   | 2                | 0       | 0      | 0                | 0             | 1           | 0             | 38888888            | yes           | 2                     | 2                      | 0                    | 0               | 0                           | 40        | no           |                |                             |                               |                                   |               | 0        |    |
| 4            | BC    | yes                     | 0                     | 0                   | 0                | 1       | 0      | 0                | 0             | 0           | 0             | 55555555            | no            | 0                     | 0                      | 0                    | 0               | 0                           | 0         | 0            | 0              | 0                           | 0                             | 0                                 | 0             | 0        |    |
| 5            | BC    | yes                     | 0                     | 2                   | 2                | 1       | 0      | 0                | 0             | 0           | 0             | 18888888            | no            | 2                     | 0                      | 0                    | 0               | 0                           | 40        | no           |                |                             |                               |                                   |               | 0        |    |
| 6            | BC    | yes                     | 0                     | 2                   | 2                | 1       | 0      | 0                | 0             | 0           | 0             | 27777778            | no            | 0                     | 0                      | 0                    | 0               | 0                           | 0         | 0            | 0              | 0                           | 0                             | 0                                 | 0             | 0        |    |
| 7            | BC    | yes                     | 0                     | 2                   | 2                | 1       | 1      | 0                | 0             | 0           | 0             | 33333333            | no            | 0                     | 0                      | 0                    | 0               | 0                           | 0         | 0            | 0              | 0                           | 0                             | 0                                 | 0             | 0        |    |
| 8            | BC    | yes                     | 0                     | 2                   | 2                | 1       | 0      | 0                | 0             | 0           | 0             | 16888888            | yes           | 0                     | 2                      | 2                    | 2               | 2                           | 80        | yes          | 0              | 0                           | 0                             | 0                                 | 0             | 20       |    |
| 9            | BC    | yes                     | 0                     | 2                   | 2                | 1       | 1      | 0                | 0             | 1           | 0             | 38888888            | yes           | 0                     | 2                      | 2                    | 2               | 2                           | 60        | yes          | 0              | 0                           | 0                             | 0                                 | 0             | 0        |    |
| 10           | BC    | yes                     | 0                     | 2                   | 2                | 1       | 0      | 0                | 2             | 1           | 1             | 50                  | yes           | 2                     | 2                      | 2                    | 2               | 2                           | 50        | yes          | 0              | 0                           | 0                             | 0                                 | 0             | 0        |    |
| 11           | BC    | yes                     | 0                     | 2                   | 2                | 1       | 0      | 0                | 0             | 0           | 0             | 27777778            | yes           | 2                     | 0                      | 0                    | 0               | 0                           | 20        | no           |                |                             |                               |                                   |               | 0        |    |
| 12           | BC    | yes                     | 0                     | 0                   | 0                | 1       | 0      | 0                | 0             | 0           | 0             | 55555555            | no            | 0                     | 0                      | 0                    | 0               | 0                           | 0         | 0            | 0              | 0                           | 0                             | 0                                 | 0             | 0        |    |
| 13           | BC    | yes                     | 0                     | 2                   | 2                | 1       | 0      | 0                | 0             | 0           | 0             | 27777778            | no            | 0                     | 0                      | 0                    | 0               | 0                           | 0         | 0            | 0              | 0                           | 0                             | 0                                 | 0             | 0        |    |
| 14           | BC    | yes                     | 0                     | 2                   | 2                | 1       | 2      | 0                | 0             | 0           | 1             | 55555555            | yes           | 2                     | 0                      | 0                    | 0               | 0                           | 20        | no           |                |                             |                               |                                   |               | 0        |    |
| 15           | BC    | yes                     | 2                     | 2                   | 0                | 1       | 0      | 0                | 0             | 1           | 0             | 33333333            | yes           | 2                     | 2                      | 0                    | 2               | 0                           | 60        | no           |                |                             |                               |                                   |               | 0        |    |
| 16           | BC    | yes                     | 0                     | 0                   | 0                | 1       | 0      | 0                | 0             | 2           | 1             | 11111111            | no            | 0                     | 0                      | 0                    | 0               | 0                           | 0         | 0            | 0              | 0                           | 0                             | 0                                 | 0             | 0        |    |
| 17           | BC    | yes                     | 0                     | 2                   | 2                | 1       | 0      | 0                | 2             | 1           | 0             | 38888888            | yes           | 0                     | 0                      | 0                    | 0               | 0                           | 0         | 0            | 0              | 0                           | 0                             | 0                                 | 0             | 0        |    |
| 18           | BC    | yes                     | 0                     | 2                   | 2                | 1       | 0      | 0                | 0             | 0           | 0             | 22222222            | no            | 0                     | 0                      | 0                    | 0               | 0                           | 0         | 0            | 0              | 0                           | 0                             | 0                                 | 0             | 0        |    |
| 19           | BC    | yes                     | 0                     | 0                   | 0                | 1       | 0      | 0                | 2             | 0           | 1             | 22222222            | no            | 0                     | 0                      | 0                    | 0               | 0                           | 0         | 0            | 0              | 0                           | 0                             | 0                                 | 0             | 0        |    |
| 20           | BC    | yes                     | 0                     | 2                   | 2                | 1       | 0      | 0                | 0             | 0           | 0             | 27777778            | yes           | 2                     | 2                      | 0                    | 2               | 0                           | 60        | yes          | 0              | 0                           | 0                             | 0                                 | 0             | 0        | 0  |
| 21           | BC    | yes                     | 0                     | 2                   | 2                | 1       | 1      | 0                | 2             | 0           | 0             | 33333333            | no            | 0                     | 0                      | 0                    | 0               | 0                           | 0         | 0            | 0              | 0                           | 0                             | 0                                 | 0             | 0        |    |
| 22           | BC    | yes                     | 0                     | 2                   | 2                | 0       | 0      | 0                | 0             | 1           | 0             | 38888888            | yes           | 0                     | 0                      | 0                    | 0               | 0                           | 0         | 0            | 0              | 0                           | 0                             | 0                                 | 0             | 20       |    |
| 23           | BC    | yes                     | 2                     | 2                   | 0                | 1       | 0      | 0                | 2             | 0           | 1             | 44444444            | yes           | 2                     | 0                      | 0                    | 0               | 2                           | 40        | yes          | 0              | 0                           | 0                             | 0                                 | 0             | 20       |    |
| 24           | BC    | yes                     | 0                     | 2                   | 2                | 1       | 0      | 0                | 0             | 1           | 1             | 38888888            | yes           | 2                     | 2                      | 0                    | 2               | 2                           | 80        | no           |                |                             |                               |                                   |               | 0        |    |
| 25           | BC    | yes                     | 0                     | 2                   | 2                | 1       | 0      | 0                | 0             | 0           | 0             | 27777778            | no            | 0                     | 0                      | 0                    | 0               | 0                           | 0         | 0            | 0              | 0                           | 0                             | 0                                 | 0             | 0        |    |
| 26           | BC    | yes                     | 0                     | 2                   | 2                | 1       | 2      | 0                | 2             | 1           | 0             | 50                  | yes           | 0                     | 2                      | 0                    | 0               | 0                           | 0         | 0            | 0              | 0                           | 0                             | 0                                 | 0             | 0        |    |
| 27           | BC    | yes                     | 0                     | 2                   | 2                | 1       | 2      | 2                | 2             | 0           | 0             | 61111111            | yes           | 0                     | 0                      | 0                    | 0               | 0                           | 0         | 0            | 0              | 0                           | 0                             | 0                                 | 0             | 0        |    |
| 28           | BC    | yes                     | 0                     | 2                   | 2                | 1       | 2      | 0                | 2             | 1           | 1             | 61111111            | yes           | 0                     | 0                      | 0                    | 2               | 0                           | 20        | no           |                |                             |                               |                                   |               | 0        |    |
| 29           | BC    | yes                     | 2                     | 2                   | 2                | 1       | 0      | 0                | 0             | 0           | 1             | 44444444            | yes           | 2                     | 2                      | 0                    | 2               | 0                           | 40        | yes          | 0              | 0                           | 0                             | 0                                 | 0             | 0        |    |
| 30           | BC    | yes                     | 0                     | 2                   | 2                | 1       | 0      | 0                | 0             | 0           | 0             | 33333333            | yes           | 0                     | 2                      | 0                    | 0               | 0                           | 20        | no           |                |                             |                               |                                   |               | 0        |    |
| 31           | BC    | yes                     | 0                     | 0                   | 0                | 1       | 0      | 0                | 0             | 1           | 0             | 27777778            | no            | 0                     | 0                      | 2                    | 2               | 2                           | 60        | yes          | 0              | 0                           | 0                             | 0                                 | 0             | 0        |    |
| 32           | BC    | yes                     | 0                     | 2                   | 2                | 1       | 0      | 0                | 0             | 0           | 1             | 33333333            | yes           | 0                     | 2                      | 0                    | 2               | 0                           | 40        | yes          | 2              | 0                           | 0                             | 0                                 | 0             | 20       |    |
| 33           | BC    | yes                     | 0                     | 2                   | 2                | 1       | 0      | 0                | 0             | 0           | 0             | 27777778            | yes           | 2                     | 0                      | 0                    | 0               | 0                           | 20        | yes          | 0              | 0                           | 0                             | 0                                 | 0             | 0        |    |
| 34           | BC    | yes                     | 2                     | 2                   | 2                | 1       | 0      | 0                | 0             | 1           | 0             | 44444444            | yes           | 2                     | 0                      | 0                    | 0               | 0                           | 20        | no           |                |                             |                               |                                   |               | 0        |    |
| 35           | BC    | yes                     | 0                     | 2                   | 2                | 1       | 0      | 0                | 0             | 0           | 0             | 27777778            | no            | 0                     | 0                      | 0                    | 0               | 0                           | 0         | 0            | 0              | 0                           | 0                             | 0                                 | 0             | 0        |    |
| 36           | BC    | yes                     | 0                     | 2                   | 0                | 0       | 0      | 0                | 0             | 0           | 0             | 11111111            | yes           | 0                     | 0                      | 2                    | 0               | 0                           | 20        | yes          | 0              | 0                           | 0                             | 0                                 | 0             | 0        |    |
| 37           | BC    | yes                     | 0                     | 2                   | 0                | 1       | 0      | 0                | 0             | 0           | 1             | 22222222            | yes           | 2                     | 0                      | 0                    | 0               | 0                           | 20        | yes          | 0              | 0                           | 0                             | 0                                 | 0             | 0        |    |
| 38           | BC    | yes                     | 0                     | 2                   | 2                | 1       | 0      | 0                | 0             | 1           | 1             | 38888888            | yes           | 0                     | 2                      | 0                    | 0               | 0                           | 20        | yes          | 0              | 0                           | 0                             | 0                                 | 0             | 0        |    |
| 39           | BC    | yes                     | 2                     | 2                   | 2                | 1       | 0      | 0                | 0             | 1           | 0             | 44444444            | yes           | 2                     | 2                      | 0                    | 0               | 0                           | 40        | no           |                |                             |                               |                                   |               | 0        |    |
| 40           | BC    | yes                     | 0                     | 2                   | 2                | 1       | 0      | 0                | 0             | 0           | 0             | 33333333            | yes           | 2                     | 2                      | 0                    | 0               | 0                           | 40        | yes          | 0              | 0                           | 0                             | 0                                 | 0             | 0        |    |
| 41           | BC    | yes                     | 0                     | 2                   | 2                | 1       | 1      | 0                | 0             | 0           | 0             | 38888888            | yes           | 0                     | 0                      | 0                    | 0               | 0                           | 0         | 0            | 0              | 0                           | 0                             | 0                                 | 0             | 0        |    |
| 42           | BC    | yes                     | 0                     | 2                   | 2                | 1       | 0      | 0                | 0             | 0           | 0             | 33333333            | yes           | 0                     | 0                      | 2                    | 0               | 0                           | 20        | no           |                |                             |                               |                                   |               | 0        |    |
| 43           | BC    | yes                     | 0                     | 2                   | 2                | 1       | 0      | 0                | 2             | 1           | 0             | 44444444            | yes           | 2                     | 2                      | 0                    | 0               | 0                           | 40        | yes          | 2              | 0                           | 0                             | 0                                 | 0             | 20       |    |
| 44           | BC    | yes                     | 0                     | 2                   | 2                | 1       | 0      | 0                | 0             | 1           | 0             | 33333333            | yes           | 0                     | 0                      | 0                    | 0               | 0                           | 0         | 0            | 0              | 0                           | 0                             | 0                                 | 0             | 0        |    |
| 45           | BC    | yes                     | 0                     | 2                   | 2                | 1       | 0      | 0                | 0             | 1           | 0             | 33333333            | no            | 0                     | 0                      | 0                    | 0               | 0                           | 0         | 0            | 0              | 0                           | 0                             | 0                                 | 0             | 0        |    |
| 46           | BC    | yes                     | 0                     | 2                   | 2                | 1       | 0      | 0                | 0             | 0           | 1             | 33333333            | yes           | 0                     | 2                      | 2                    | 2               | 2                           | 60        | yes          | 0              | 0                           | 0                             | 0                                 | 0             | 0        |    |
| 47           | BC    | yes                     | 0                     | 2                   | 2                | 1       | 0      | 0                | 0             | 1           | 0             | 33333333            | yes           | 2                     | 2                      | 0                    | 0               | 0                           | 40        | no           |                |                             |                               |                                   |               | 0        |    |
| 48           | BC    | yes                     | 0                     | 2                   | 2                | 1       | 0      | 0                | 0             | 1           | 1             | 38888888            | yes           | 0                     | 0                      | 0                    | 0               | 0                           | 0         | 0            | 0              | 0                           | 0                             | 0                                 | 0             | 0        |    |
| 49           | BC    | yes                     | 0                     | 2                   | 2                | 1       | 0      | 0                | 0             | 1           | 0             | 33333333            | yes           | 0                     | 0                      | 0                    | 0               | 0                           | 0         | 0            | 0              | 0                           | 0                             | 0                                 | 0             | 0        |    |
| 50           | BC    | yes                     | 0                     | 2                   | 2                | 1       | 0      | 0                | 0             | 0           | 0             | 33333333            | yes           | 2                     | 0                      | 0                    | 0               | 0                           | 20        | yes          | 0              | 0                           | 0                             | 0                                 | 0             | 0        |    |
| 51           | AC    | yes                     | 0                     | 2                   | 2                | 1       | 2      | 0                | 0             | 0           | 0             | 38888888            | no            | 0                     | 0                      | 0                    | 0               | 0                           | 0         | 0            | 0              | 0                           | 0                             | 0                                 | 0             | 0        |    |
| 52           | AC    | yes                     | 0                     | 2                   | 2                | 1       | 0      | 0                | 0             | 1           | 0             | 44444444            | no            | 0                     | 0                      | 0                    | 0               | 0                           | 0         | 0            | 0              | 0                           | 0                             | 0                                 | 0             | 0        |    |
| 53           | AC    | yes                     | 0                     | 2                   | 2                | 1       | 0      | 0                | 0             | 0           | 2             | 44444444            | yes           | 2                     | 2                      | 0                    | 2               | 0                           | 60        | yes          | 2              | 2                           | 2                             | 2                                 | 2             | 100      |    |
| 54           | AC    | yes                     | 0                     | 2                   | 2                | 1       | 0      | 0                | 0             | 0           | 1             | 38888888            | yes           | 0                     | 2                      | 2                    | 2               | 2                           | 0         | 60           | no             |                             |                               |                                   |               | 0        |    |
| 55           | AC    | yes                     | 2                     | 2                   | 2                | 0       | 2      | 0                | 0             | 1           | 1             | 55555555            | yes           | 2                     | 2                      | 2                    | 2               | 2                           | 0         | 60           | yes            | 0                           | 2                             | 2                                 | 2             | 0        | 60 |
| 56           | AC    | yes                     | 0                     | 2                   | 2                | 1       | 0      | 0                | 2             | 1           | 0             | 61111111            | yes           | 2                     | 2                      | 0                    | 0               | 0                           | 40        | no           |                |                             |                               |                                   |               | 0        |    |
| 57           | AC    | yes                     | 0                     | 2                   | 2                | 1       | 0      | 0                | 0             | 1           | 1             | 38888888            | yes           | 2                     | 2                      | 0                    | 0               | 0                           | 40        | yes          | 2              | 0                           | 0                             | 0                                 | 0             | 20       |    |
| 58           | AC    | yes                     | 0                     | 2                   | 2                | 1       | 2      | 0                | 0             | 1           | 0             | 44444444            | yes           | 2                     | 2                      | 0                    | 0               | 0                           | 40        | no           |                |                             |                               |                                   |               | 0        |    |
| 59           | AC    | yes                     | 0                     | 2                   | 2                | 1       | 0      | 0                | 0             | 0           | 0             | 33333333            | yes           | 0                     | 2                      | 2                    | 2               | 2                           | 0         | 60           | no             |                             |                               |                                   |               | 0        |    |
| 60           | AC    | yes                     | 2                     | 2                   | 2                | 1       | 2      | 0                | 0             | 2           | 0             | 61111111            | yes           | 2                     | 2                      | 2                    | 2               | 2                           | 80        | no           |                |                             |                               |                                   |               | 0        |    |
| 61           | AC    | yes                     | 0                     | 2                   | 2                | 1       | 0      | 0                | 0             | 1           | 0             | 38888888            | yes           | 2                     | 0                      | 0                    | 0               | 0                           | 20        | no           |                |                             |                               |                                   |               | 0        |    |
| 62           | AC    | yes                     | 2                     | 2                   | 2                | 1       | 0      | 0                | 2             | 0           | 1             | 55555555            | yes           | 2                     | 0                      | 0                    | 0               | 0                           | 20        | yes          | 0              | 0                           | 2                             | 2                                 | 0             | 40       |    |
| 63           | AC    | yes                     | 2                     | 2                   | 0                | 1       | 1      | 0                | 0             | 1           | 1             | 44444444            | yes           | 2                     | 2                      | 0                    | 0               | 0                           | 40        | yes          | 2              | 0                           | 0                             | 2                                 | 2             | 0        | 40 |
| 64           | AC    | yes                     | 0                     | 2                   | 2                | 0       | 1      | 0                | 0             | 1           | 1             | 44444444            | yes           | 2                     | 2                      | 0                    | 0               | 0                           | 80        | no           |                |                             |                               |                                   |               | 0        |    |
| 65           | AC    | yes                     | 0                     | 2                   | 2                | 1       | 0      | 0                | 0             | 0           | 0             | 33333333            | yes           | 2                     | 2                      | 0                    | 0               | 0                           | 60        | no           |                |                             |                               |                                   |               | 0        |    |
| 66           | AC    | yes                     | 0                     | 2                   | 2                | 1       | 0      | 0                | 0             | 0           | 0             | 33333333            | yes           | 2                     | 0                      | 0                    | 0               | 0                           | 20        | no           |                |                             |                               |                                   |               | 0        |    |
| 67           | AC    | yes                     | 0                     | 2                   | 2                | 1       | 1      | 0                | 0             | 0           | 0             | 38888888            | no            | 0                     | 0                      | 0                    | 0               | 0                           | 0         | 0            | 0              | 0                           | 0                             | 0                                 | 0             | 0        |    |
| 68           | AC    | yes                     | 0                     | 2                   | 2                | 1       | 2      | 0                | 0             | 1           | 0             | 44444444            | yes           | 2                     | 2                      | 2                    | 2               | 2                           | 0         | 80           | no             |                             |                               |                                   |               | 0        |    |
| 69           | AC    | yes                     | 2                     | 2                   | 2                | 1       | 0      | 0                | 2             | 1           | 0             | 66888888            | no            | 0                     | 0                      | 0                    | 0               | 0                           | 0         | 0            | 0              | 0                           | 0                             | 0                                 | 0             | 0        |    |
| 70           | AC    | yes                     | 0                     | 2                   | 2                | 0       | 2      | 0                | 0             | 1           | 1             | 44444444            | yes           | 2                     | 2                      | 0                    | 2               | 0                           | 60        | no           |                |                             |                               |                                   |               | 0        |    |
| 71           | AC    |                         |                       |                     |                  |         |        |                  |               |             |               |                     |               |                       |                        |                      |                 |                             |           |              |                |                             |                               |                                   |               |          |    |
