# Supplementary material for: Effect of a Neonatal Resuscitation Course on Healthcare Providers’ Performances Assessed by Video Recording in a Low-Resource Setting
Source: PubMed Central journal article supplement (PMC4684235; doi:10.1371/journal.pone.0144443), 2015-12-11
Supplement: pone.0144443.s002.pdf [file pone.0144443.s002.pdf]

**ID of patient:** .....

**Evaluation date:** .....

**EVALUATION SCORE:** - 2 = correctly done; 0 = not done; 1 = done, but incorrect for method and/or timing

**INITIAL STEPS**

| Score                                                     | 2 | 0 | 1 | Time elapsed from birth/comments |
|-----------------------------------------------------------|---|---|---|----------------------------------|
| Check material (suction system, bag, mask, oxygen supply) |   |   |   |                                  |
| Body positioned correctly                                 |   |   |   |                                  |
| Head positioned correctly                                 |   |   |   |                                  |
| Suctioning (if indicated)                                 |   |   |   |                                  |
| Dry the baby                                              |   |   |   |                                  |
| Remove wet linen                                          |   |   |   |                                  |
| Neonate uncovered under infant warmer                     |   |   |   |                                  |
| Stimulation                                               |   |   |   |                                  |
| HR assessment (stethoscope or umbilical pulse)            |   |   |   |                                  |
| <b>TOTAL</b>                                              |   |   |   |                                  |

**VENTILATION**

| Score                                                       | 2 | 0 | 1 | Time elapsed from birth/comments |
|-------------------------------------------------------------|---|---|---|----------------------------------|
| Start PPV in room air                                       |   |   |   |                                  |
| Correct face mask positioning                               |   |   |   |                                  |
| Ventilatory rate at 40-60 breaths/min                       |   |   |   |                                  |
| Adequate chest rise                                         |   |   |   |                                  |
| HR assessment after 30 sec (stethoscope or umbilical pulse) |   |   |   |                                  |
| <b>TOTAL</b>                                                |   |   |   |                                  |

**CHEST COMPRESSIONS**

| Score                                                          | 2 | 0 | 1 | Time elapsed from birth/comments |
|----------------------------------------------------------------|---|---|---|----------------------------------|
| Correct method (2 fingers/2 thumbs)                            |   |   |   |                                  |
| Correct frequency and depth                                    |   |   |   |                                  |
| Correct ventilatory frequency                                  |   |   |   |                                  |
| Correct CC/ventilation ratio (3/1)                             |   |   |   |                                  |
| HR assessment after 60-90 sec (stethoscope or umbilical pulse) |   |   |   |                                  |
| <b>TOTAL</b>                                                   |   |   |   |                                  |
